## B-lines Visualization and Lung Aeration Assessment: Mind the Ultrasound Machine Setting: Erratum

In the March 2019 issue, the article “B-lines Visualization and Lung Aeration Assessment: Mind the Ultrasound Machine Setting” (ANESTHESIOLOGY 2019; 130:444. doi: 10.1097/ALN.0000000000002522) contains an error in the Competing Interests section, which reads “The authors declare no competing interests.” This section should have read as follows: “Dr. Mongodi received fees for lectures from General Electric (Boston, Massachusetts). Dr. Mojoli received fees for lectures from General Electric and Hamilton Medical (Bonaduz, Switzerland). The other authors declare no competing interests.”

The authors deeply regret this error. The online version and PDF of the article have been corrected.

DOI: 10.1097/ALN.0000000000003267

## Reference

1. Mongodi S, Stella A, Orlando A, Mojoli F: B-lines Visualization and Lung Aeration Assessment: Mind the Ultrasound Machine Setting. ANESTHESIOLOGY 2019; 130:444. doi: 10.1097/ALN.0000000000002522

Subomohyoid Anterior Suprascapular Block *versus* Interscalene Block for Arthroscopic Shoulder Surgery: A Multicenter Randomized Trial: Erratum

The authors of an article published in the April 2020 issue, “Subomohyoid Anterior Suprascapular Block *versus* Interscalene Block for Arthroscopic Shoulder Surgery: A Multicenter Randomized Trial,”<sup>1</sup> note two errors in their published article and present below the relevant corrections.

1. The description of the area under the curve in the “Sample Size” section expresses this outcome as “units per measurement” and “units/24-hr interval.” This description can be misleading, as multiplication (and not division) is usually used to express this outcome. To avoid any ambiguity, the authors have modified the reporting in this section to “units for each measurement” and “units during a 24-h interval.” “U/24-h interval” has also been corrected to “units during 24-h interval” in the first row of table 2.
2. To estimate the area under the curve, the authors used the “trapezoid rule,” and not the “trapezoid role” as incorrectly described in the penultimate paragraph of the “Statistical Analysis” section on page 844.

The authors regret and apologize for these errors. The online version and PDF of the article have been corrected.

DOI: 10.1097/ALN.0000000000003314

## Reference

1. Abdallah FW, Wijesundera DN, Laupacis A, Brull R, Mocon A, Hussain N, Thorpe KE, Chan VWS. Subomohyoid anterior suprascapular block *versus* interscalene block for arthroscopic shoulder surgery: A multicenter randomized trial. ANESTHESIOLOGY 2020; 132:839–53. doi: 10.1097/ALN.0000000000003132.
